# Supplementary material
Source: PubMed Central journal article supplement (PMC7920184)
Supplement: ASN.2020040502SupplementaryData.pdf [file ASN.2020040502SupplementaryData.pdf]

## **Racial differences in AKI incidence following percutaneous coronary intervention**

### **Supplemental Material**

#### **Table of contents:**

Table 1: Availability of creatinine measurements within 30 days before percutaneous coronary intervention (PCI) for ascertainment of the reference creatinine value

Table 2: Association of race and baseline eGFR with odds of incident AKI following PCI in a complete-case analysis without multiple imputation for missing data

**Table 1: Availability of creatinine measurements within 30 days before percutaneous coronary intervention (PCI) for ascertainment of the reference creatinine value**

|                                                                                                                                                                                                                                                                                                          | <b>Overall</b> | <b>White</b> | <b>Race<br/>Black</b> | <b>Other</b> |
|----------------------------------------------------------------------------------------------------------------------------------------------------------------------------------------------------------------------------------------------------------------------------------------------------------|----------------|--------------|-----------------------|--------------|
| No. of patients                                                                                                                                                                                                                                                                                          | 9422           | 7084         | 1854                  | 484          |
| No. of serum creatinine measurements per patient                                                                                                                                                                                                                                                         |                |              |                       |              |
| Mean (SD)                                                                                                                                                                                                                                                                                                | 2.6 (3.3)      | 2.6 (3.3)    | 2.8 (3.4)             | 2.5 (3.0)    |
| Median [IQR]                                                                                                                                                                                                                                                                                             | 2 [1, 3]       | 2 [1, 3]     | 2 [1, 3]              | 2 [1, 3]     |
| Reference creatinine value, mean (SD)                                                                                                                                                                                                                                                                    | 1.17 (0.89)    | 1.13 (0.79)  | 1.34 (1.18)           | 1.15 (1.03)  |
| Baseline eGFR, median [IQR]                                                                                                                                                                                                                                                                              | 74 [57, 89]    | 73 [56, 88]  | 78 [58, 97]           | 78 [60, 93]  |
| Definitions:                                                                                                                                                                                                                                                                                             |                |              |                       |              |
| <ul style="list-style-type: none"> <li>• Reference value: the average of all serum creatinine measurements obtained in an outpatient or inpatient setting within 30 days before PCI</li> <li>• Baseline eGFR: calculated from the reference creatinine value above using the CKD-EPI equation</li> </ul> |                |              |                       |              |

**Table 2: Association of race and baseline eGFR with odds of incident AKI following percutaneous coronary intervention in a complete-case analysis without correction for missing data using multiple imputation**

| Variables                                                                                                                                                                                                                                                                                                                                                                                                                                                                                                                                                                                                                                                                                                                                                                                                                                                                                                                                                                                                                                                                                                                                                                                                                                                                                                                                                                                                                                                                                                                                                                                                                                   | Incident AKI |                         |         |
|---------------------------------------------------------------------------------------------------------------------------------------------------------------------------------------------------------------------------------------------------------------------------------------------------------------------------------------------------------------------------------------------------------------------------------------------------------------------------------------------------------------------------------------------------------------------------------------------------------------------------------------------------------------------------------------------------------------------------------------------------------------------------------------------------------------------------------------------------------------------------------------------------------------------------------------------------------------------------------------------------------------------------------------------------------------------------------------------------------------------------------------------------------------------------------------------------------------------------------------------------------------------------------------------------------------------------------------------------------------------------------------------------------------------------------------------------------------------------------------------------------------------------------------------------------------------------------------------------------------------------------------------|--------------|-------------------------|---------|
|                                                                                                                                                                                                                                                                                                                                                                                                                                                                                                                                                                                                                                                                                                                                                                                                                                                                                                                                                                                                                                                                                                                                                                                                                                                                                                                                                                                                                                                                                                                                                                                                                                             | Odds ratio   | 95% confidence interval | p-value |
| No. of events/no. of patients                                                                                                                                                                                                                                                                                                                                                                                                                                                                                                                                                                                                                                                                                                                                                                                                                                                                                                                                                                                                                                                                                                                                                                                                                                                                                                                                                                                                                                                                                                                                                                                                               | 640/7351     |                         |         |
| Race                                                                                                                                                                                                                                                                                                                                                                                                                                                                                                                                                                                                                                                                                                                                                                                                                                                                                                                                                                                                                                                                                                                                                                                                                                                                                                                                                                                                                                                                                                                                                                                                                                        |              |                         | <0.001  |
| White                                                                                                                                                                                                                                                                                                                                                                                                                                                                                                                                                                                                                                                                                                                                                                                                                                                                                                                                                                                                                                                                                                                                                                                                                                                                                                                                                                                                                                                                                                                                                                                                                                       | Reference    | Reference               |         |
| Black                                                                                                                                                                                                                                                                                                                                                                                                                                                                                                                                                                                                                                                                                                                                                                                                                                                                                                                                                                                                                                                                                                                                                                                                                                                                                                                                                                                                                                                                                                                                                                                                                                       | 1.85         | 1.49 to 2.30            |         |
| Other                                                                                                                                                                                                                                                                                                                                                                                                                                                                                                                                                                                                                                                                                                                                                                                                                                                                                                                                                                                                                                                                                                                                                                                                                                                                                                                                                                                                                                                                                                                                                                                                                                       | 1.32         | 0.88 to 1.97            |         |
| Baseline eGFR, ml/min/1.73m <sup>2</sup>                                                                                                                                                                                                                                                                                                                                                                                                                                                                                                                                                                                                                                                                                                                                                                                                                                                                                                                                                                                                                                                                                                                                                                                                                                                                                                                                                                                                                                                                                                                                                                                                    |              |                         | <0.001  |
| ≥90                                                                                                                                                                                                                                                                                                                                                                                                                                                                                                                                                                                                                                                                                                                                                                                                                                                                                                                                                                                                                                                                                                                                                                                                                                                                                                                                                                                                                                                                                                                                                                                                                                         | Reference    | Reference               |         |
| 60 to <90                                                                                                                                                                                                                                                                                                                                                                                                                                                                                                                                                                                                                                                                                                                                                                                                                                                                                                                                                                                                                                                                                                                                                                                                                                                                                                                                                                                                                                                                                                                                                                                                                                   | 0.96         | 0.72 to 1.27            |         |
| 30 to <60                                                                                                                                                                                                                                                                                                                                                                                                                                                                                                                                                                                                                                                                                                                                                                                                                                                                                                                                                                                                                                                                                                                                                                                                                                                                                                                                                                                                                                                                                                                                                                                                                                   | 2.40         | 1.77 to 3.25            |         |
| 15 to <30                                                                                                                                                                                                                                                                                                                                                                                                                                                                                                                                                                                                                                                                                                                                                                                                                                                                                                                                                                                                                                                                                                                                                                                                                                                                                                                                                                                                                                                                                                                                                                                                                                   | 5.21         | 3.34 to 8.14            |         |
| <15                                                                                                                                                                                                                                                                                                                                                                                                                                                                                                                                                                                                                                                                                                                                                                                                                                                                                                                                                                                                                                                                                                                                                                                                                                                                                                                                                                                                                                                                                                                                                                                                                                         | 14.77        | 8.77 to 24.87           |         |
| Interaction of race and baseline eGFR                                                                                                                                                                                                                                                                                                                                                                                                                                                                                                                                                                                                                                                                                                                                                                                                                                                                                                                                                                                                                                                                                                                                                                                                                                                                                                                                                                                                                                                                                                                                                                                                       | NA           | NA                      | 0.389   |
| <p>AKI, acute kidney injury, defined as a 1.5-fold or greater relative elevation in serum creatinine from a reference value to the highest value within seven days following percutaneous coronary intervention (PCI) or a 0.3 mg/dl absolute increase in serum creatinine from the reference value within 48 hours following the date and time of PCI.</p> <p>Baseline eGFR, estimated glomerular filtration rate, calculated from serum creatinine using the CKD-EPI equation.</p> <p>Additional model covariates include demographics: year of index PCI; sex (male vs. female); age; tobacco use. PCI procedural characteristics: PCI setting (elective vs non-elective); number of stents placed; contrast volume; systolic and diastolic BP, mmHg. Medication use: RAAS inhibitors, diuretics, and NSAIDs. Peri-procedural AKI prophylaxis: administration of intravascular fluid and N-acetylcysteine. Comorbidities: body mass index, kg/m<sup>2</sup>; acute coronary status pre-CATH (STEMI, non-STEMI, MI unspecified, unstable angina); pre-existing cardiovascular disease (prior MI, prior PCI, prior CABG, history of angina, congestive heart failure, cerebrovascular disease, peripheral vascular disease, carotid bruits); history of hyperlipidemia; diabetes and diabetes with end organ damage. Socioeconomic status: marital status (married or life-partner vs other); median household income.</p> <p>Odds ratio, confidence intervals and p-values for race and baseline eGFR are from a main effects model. The interaction p-value is from a model incorporating a cross-product of AKI with baseline eGFR.</p> |              |                         |         |
